# Supplementary material for: Analysis of Cerebral Spinal Fluid Drainage and Intracranial Pressure Peaks in Patients with Subarachnoid Hemorrhage
Source: Springer Nature journal article supplement (doi:10.1007/s12028-024-01981-9), 2024-04-15
Supplement: 12028_2024_1981_MOESM1_ESM.pdf [file 12028_2024_1981_MOESM1_ESM.pdf]

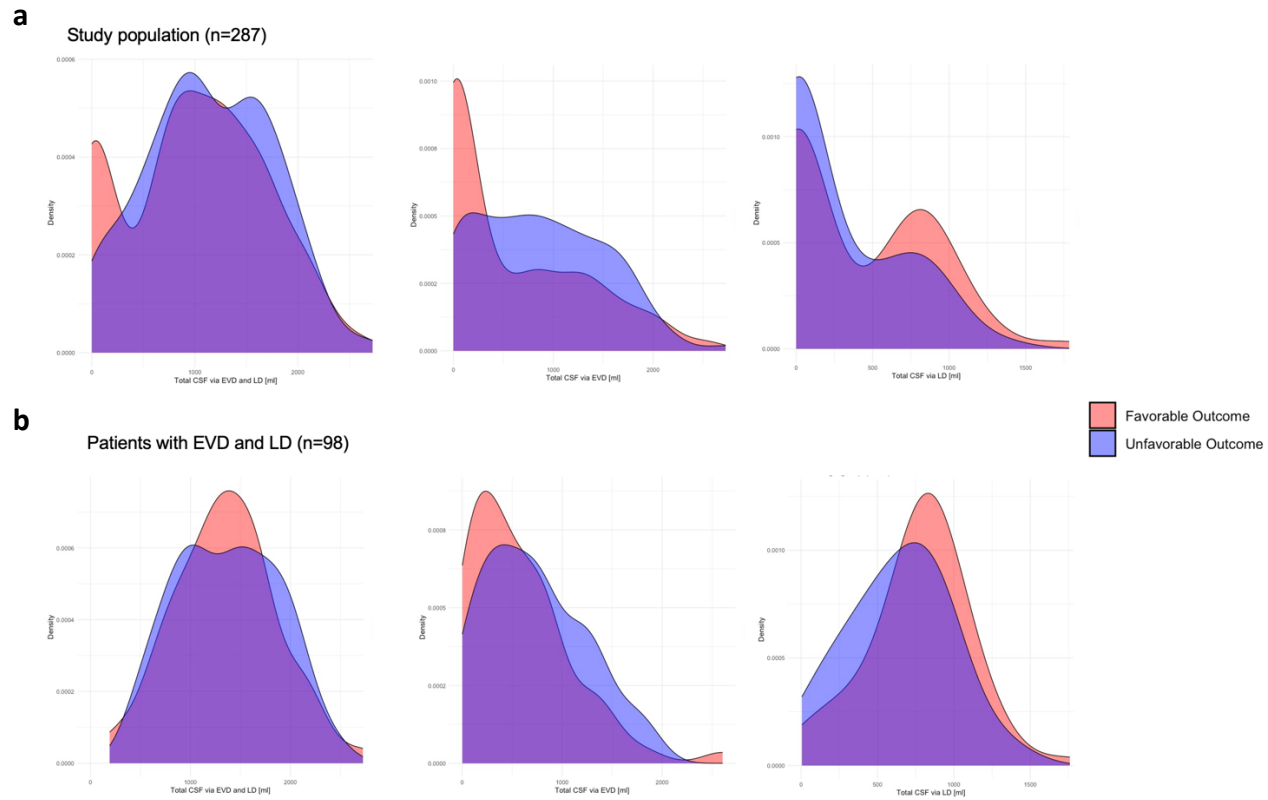

**Supplemental Figure 1.** Density plot of the drainage volumes of the whole study population (n=287, a) and patients with both EVD and LD (n=98, b). CSF: Cerebral spinal fluid, EVD: External ventricular drainage, LD: Lumbar drainage

Study population (n=287)

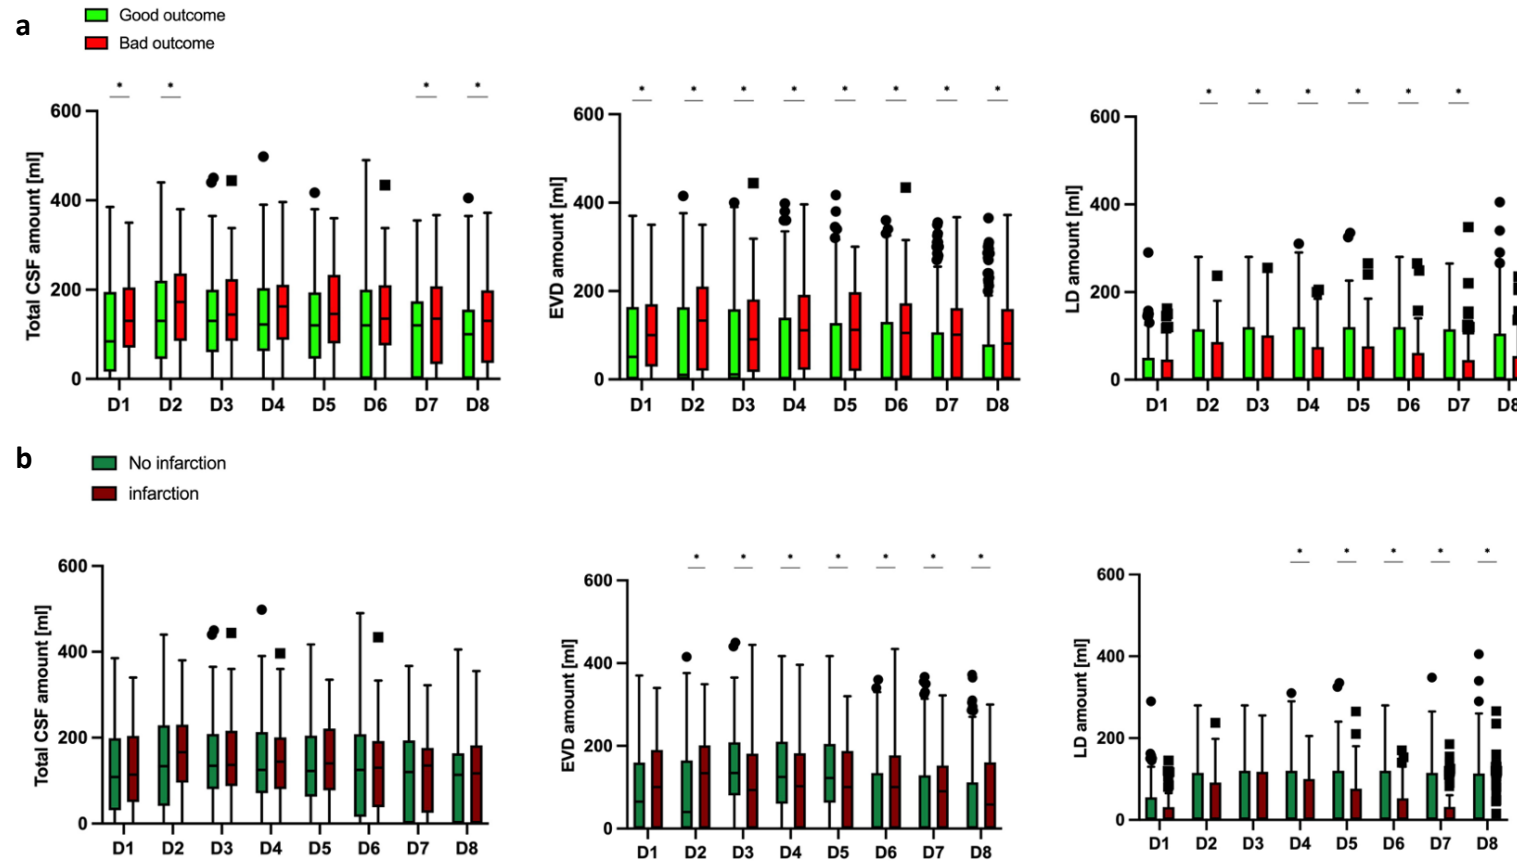

**Supplemental Figure 2.** Daily amount of CSF Drainage in the whole study population (n=287). a) Stratified according to the neurological outcome (mRS 0-2 = favorable, mRS 3-6 = unfavorable). b) Stratified according to the occurrence of secondary infarctions after treatment of aneurysms.

\*p<0.05, CSF: Cerebral spinal fluid, EVD: External ventricular drainage, LD: Lumbar drainage, D: day

a

Patients with EVD and LD (n=98)

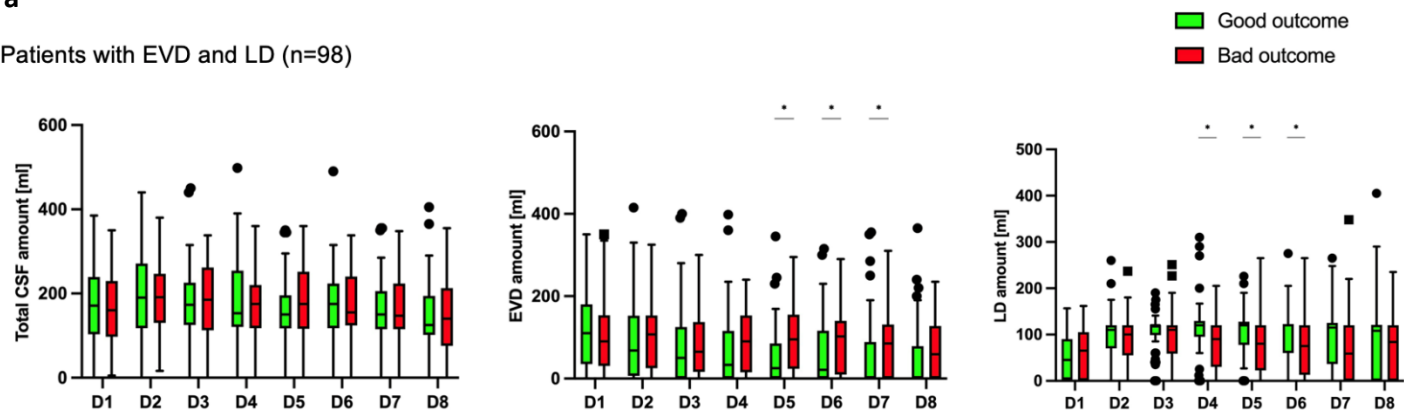

b

All patients with LD (n =140)

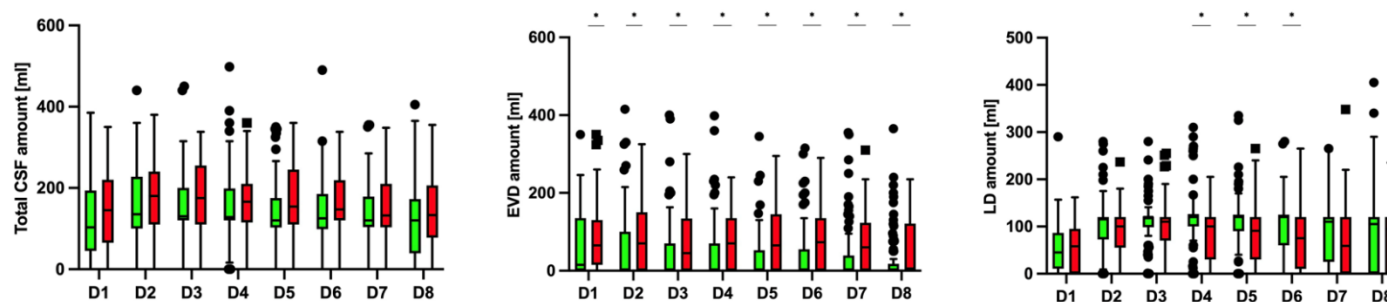

**Supplemental Figure 3.** Daily amount of CSF Drainage of the patients with both an EVD and LD (n=98, a) and in all patients treated with LD, regardless whether an EVD is present (n=140, b). Stratified according to the neurological outcome (mRS 0-2 = good, mRS 3-6 = unfavorable). In the “all patients with LD” group EVD amount was counted as zero when no EVD was in place. \*p<0.05, CSF: Cerebral spinal fluid, EVD: External ventricular drainage, LD: Lumbar drainage, D: day

a

### Neurological outcome (mRS > 2)

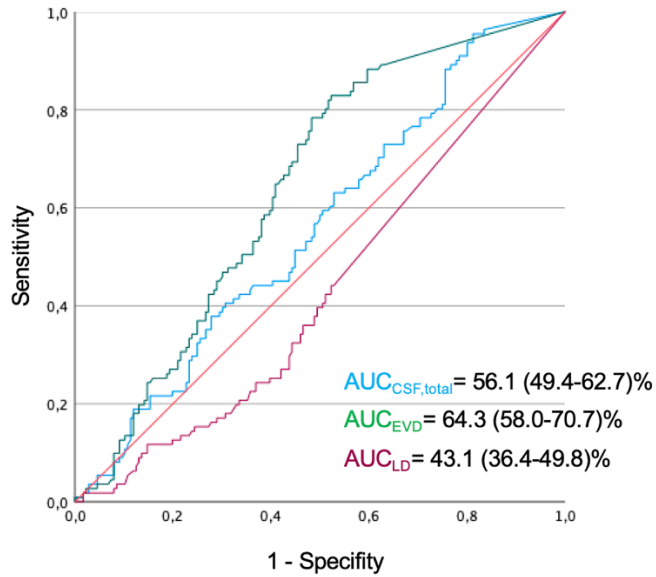

**DeLong's test:**

$AUC_{CSF, total}$  vs.  $AUC_{EVD}$ ,  $p^* < 0.001$  (sig)

$AUC_{CSF, total}$  vs.  $AUC_{LD}$ ,  $p^* = 0.043$  (sig)

$AUC_{EVD}$  vs.  $AUC_{LD}$ ,  $p^* < 0.001$  (sig)

b

### Secondary infarction

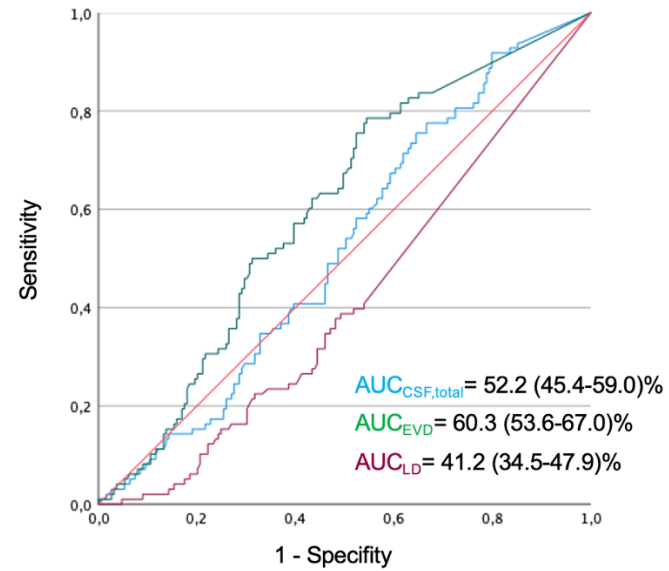

**DeLong's test:**

$AUC_{CSF, total}$  vs.  $AUC_{EVD}$ ,  $p^* < 0.001$  (sig)

$AUC_{CSF, total}$  vs.  $AUC_{LD}$ ,  $p^* = 0.021$  (sig)

$AUC_{EVD}$  vs.  $AUC_{LD}$ ,  $p^* < 0.001$  (sig)

**Supplemental Figure 4.** a) Prediction of unfavorable outcome (mRS > 2) and b) secondary infarction based on CSF amount of the whole study population (n=287). AUC: Area under the curve, CSF: Cerebral spinal fluid, EVD: External ventricular drainage, LD: Lumbar drainage

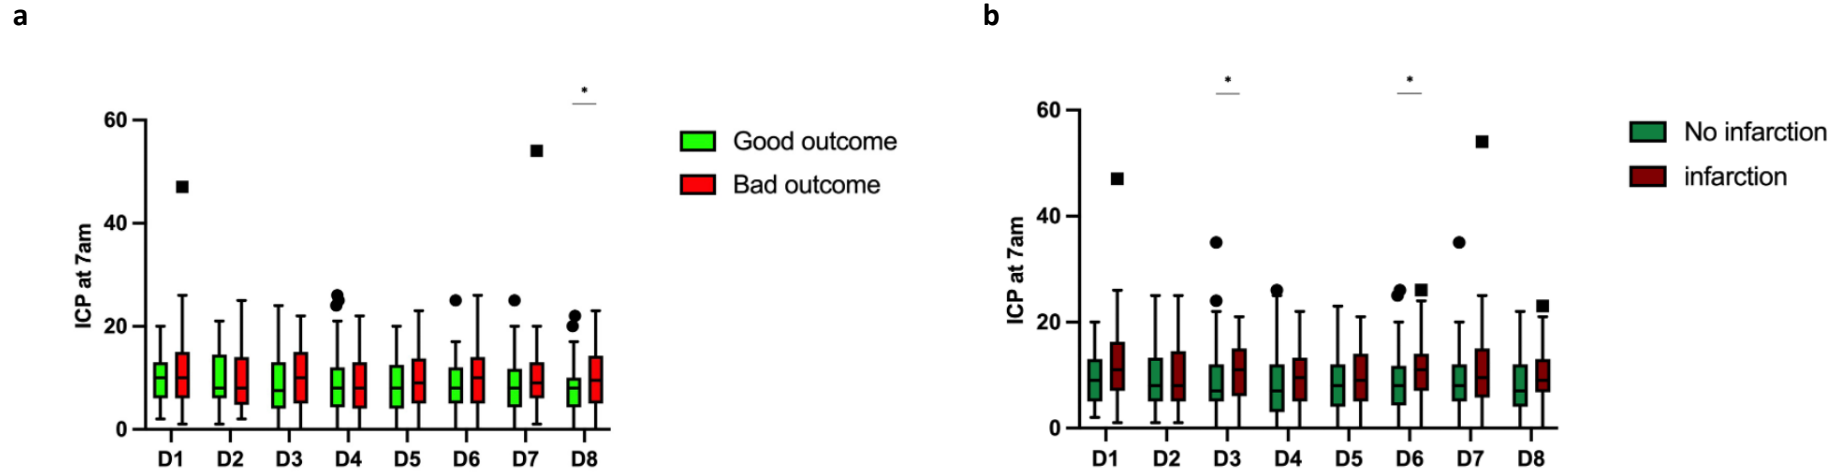

**Supplemental Figure 5.** Daily determined ICP of the patients at 7am (n=187). The patients are stratified according to a) the neurological outcome (mRS 0-2 = good, mRS 3-6 = bad) and b) occurrence of secondary infarctions after treatment of aneurysms.

\*p<0.05, ICP: Intracranial pressure, D: day

**Supplemental Table 1.** Drainage amount of study population and stratification regarding occurrence of new infarction or not

|                                  | <b>Total study population<br/>(n= 287)</b> | <b>No infarction<br/>(n = 189)</b> | <b>infarction<br/>(n = 98)</b> | <b>p value<sup>T</sup></b> |
|----------------------------------|--------------------------------------------|------------------------------------|--------------------------------|----------------------------|
| <b>Day 1</b>                     |                                            |                                    |                                |                            |
| CSF total                        | 124 ± 100                                  | 121 ± 102                          | 130 ± 98                       | 0.451                      |
| CSF EVD                          | 97 ± 99                                    | 90 ± 98                            | 110 ± 100                      | 0.068                      |
| CSF LD                           | 27 ± 44                                    | 31 ± 47                            | 20 ± 37                        | 0.063                      |
| <b>Day 2</b>                     |                                            |                                    |                                |                            |
| CSF total                        | 147 ± 106                                  | 141 ± 109                          | 161 ± 98                       | 0.105                      |
| CSF EVD                          | 100 ± 107                                  | 89 ± 107                           | 121 ± 104                      | <b>0.105</b>               |
| CSF LD                           | 47 ± 62                                    | 52 ± 64                            | 39 ± 57                        | 0.076                      |
| <b>Day 3 to 5</b>                |                                            |                                    |                                |                            |
| CSF total                        | 427 ± 269                                  | 421 ± 278                          | 438 ± 253                      | 0.735                      |
| CSF EVD                          | 273 ± 285                                  | 247 ± 291                          | 323 ± 268                      | <b>0.008</b>               |
| CSF LD                           | 153 ± 190                                  | 173 ± 196                          | 115 ± 171                      | <b>0.014</b>               |
| <b>Day 6 to 8</b>                |                                            |                                    |                                |                            |
| CSF total                        | 360 ± 267                                  | 357 ± 277                          | 364 ± 248                      | 0.636                      |
| CSF EVD                          | 230 ± 268                                  | 203 ± 274                          | 283 ± 250                      | <b>0.001</b>               |
| CSF LD                           | 129 ± 184                                  | 153 ± 200                          | 81 ± 135                       | <b>&lt; 0.001</b>          |
| <b>Total amount (Day 1 to 8)</b> |                                            |                                    |                                |                            |
| CSF total                        | 1052 ± 659                                 | 1032 ± 688                         | 1089 ± 602                     | 0.539                      |
| CSF EVD                          | 694 ± 687                                  | 626 ± 700                          | 827 ± 647                      | <b>0.04</b>                |
| CSF LD                           | 257 ± 432                                  | 406 ± 457                          | 262 ± 363                      | <b>0.09</b>                |

Abbreviations: CSF: Cerebral spinal fluid, EVD: External ventricular drainage, LD: Lumbar drainage, SD: Standard deviation. All data in ml, mean ± SD. <sup>T</sup>Mann-Whitney-U-testing for independent samples. Bold values indicate significance (p < 0.05)
